# Supplementary material for: Some like it hot: factors impacting thermal preferences of two Ponto-Caspian amphipods Dikerogammarus villosus (Sovinsky, 1894) and Dikerogammarus haemobaphes (Eichwald, 1841)
Source: PeerJ. 2018 May 31;6:e4871. doi: 10.7717/peerj.4871 (PMC5985147; doi:10.7717/peerj.4871)
Supplement: Supplemental Information 1 — We present data with observations on thermal preferences of Dikerogammarus villous (Dv) and Dikerogammarus haemobaphes (Dh) including information about their sex (F, females/M-males), status of infection (N-uninfected, Cd, infected with Cucumispora dikerogammari, Dm, infected with Dictyocoela muelleri; Db, Dictyocoela berillonum) and trial number shown in last column of the dataset. [file peerj-06-4871-s001.xlsx]

## Sheet: Raw data_Dv_Dh
Species	Sex	Temperature	Infection	Trial	Individual ID		Species:
Dv	F	31.8	N	1	1		Dv - Dikerogammarus villosus
Dv	F	31.8	N	1	2		Dh - Dikerogammarus haemobaphes
Dv	F	15.2	N	1	3
Dv	F	36.2	N	1	4		Sex:
Dv	F	10.8	N	1	5		M - male
Dv	F	29.5	N	1	6		F- female
Dv	F	21.6	N	1	7
Dv	F	20.2	N	1	8		Infection:
Dv	F	11.1	N	2	9		N-non-infected
Dv	F	32.2	N	2	10		C - Cucumispora dikerogammari
Dv	F	32.2	N	2	11		Db - Dictyocoela berillonum
Dv	F	32.2	N	2	12		Dm - Dictyocoela muelleri
Dv	F	32.2	N	2	13
Dv	F	11.1	N	2	14		Trial:
Dv	F	34.6	N	3	15		1 etc. - number of trial (replicate in the analysis)
Dv	F	34.6	N	3	16		This is a single tank with 30 amphipods tested
Dv	F	29	N	3	17
Dv	F	35.9	N	5	18		Individual ID:
Dv	F	35.9	N	5	19		1 etc. - number assigned individually to an individual within each species
Dv	F	35.9	N	5	20
Dv	F	35.9	N	5	21
Dv	F	35.9	N	5	22
Dv	F	30.9	N	5	23
Dv	F	34.2	N	6	24
Dv	F	9.6	N	6	25
Dv	F	30.9	N	6	26
Dv	F	9.6	N	6	27
Dv	F	30.9	N	6	28
Dv	F	35.6	N	7	29
Dv	F	33.9	N	7	30
Dv	F	33.9	N	7	31
Dv	F	33.9	N	7	32
Dv	F	15.3	N	7	33
Dv	F	11.2	N	8	34
Dv	F	34	N	8	35
Dv	F	34	N	8	36
Dv	F	11.2	N	8	37
Dv	F	11.2	N	8	38
Dv	F	11.2	N	8	39
Dv	F	31.1	N	8	40
Dv	F	31.1	N	8	41
Dv	F	26.6	N	8	42
Dv	F	23.2	N	8	43
Dv	F	33.8	N	9	44
Dv	F	32.7	N	9	45
Dv	F	29.1	N	9	46
Dv	F	29.1	N	9	47
Dv	F	34.3	N	10	48
Dv	F	34.3	N	10	49
Dv	F	34.3	N	10	50
Dv	F	34.3	N	10	51
Dv	F	34.3	N	10	52
Dv	F	33.5	N	11	53
Dv	F	21.3	N	11	54
Dv	F	27.1	N	12	55
Dv	F	33	N	13	56
Dv	F	33	N	13	57
Dv	F	33	N	13	58
Dv	F	28.7	N	13	59
Dv	F	28.7	N	13	60
Dv	F	23.4	N	13	61
Dv	F	13.4	N	13	62
Dv	F	35.5	N	14	63
Dv	F	35.5	N	14	64
Dv	F	35.5	N	14	65
Dv	F	35.5	N	14	66
Dv	F	35.5	N	14	67
Dv	F	9.2	N	14	68
Dv	F	26.8	N	14	69
Dv	F	32.9	N	15	70
Dv	F	32.9	N	15	71
Dv	F	32.9	N	15	72
Dv	F	32.9	N	15	73
Dv	F	32.9	N	15	74
Dv	F	32.9	N	15	75
Dv	F	20.7	N	15	76
Dv	F	18.6	N	15	77
Dv	F	35.2	N	16	78
Dv	F	35.2	N	16	79
Dv	F	35.2	N	16	80
Dv	F	35.2	N	16	81
Dv	F	35.2	N	16	82
Dv	F	35.2	N	16	83
Dv	F	35.2	N	16	84
Dv	F	35.2	N	16	85
Dv	F	13.1	N	16	86
Dv	F	13.1	N	16	87
Dv	F	32.8	N	17	88
Dv	F	25.8	N	17	89
Dv	F	23.3	N	17	90
Dv	F	23.3	N	17	91
Dv	F	35.3	N	18	92
Dv	F	26.3	N	18	93
Dv	F	26.3	N	18	94
Dv	F	32.3	N	19	95
Dv	F	32.3	N	19	96
Dv	F	32.3	N	19	97
Dv	F	32.3	N	19	98
Dv	F	32.3	N	19	99
Dv	F	28.4	N	19	100
Dv	F	28.4	N	19	101
Dv	F	28.4	N	19	102
Dv	F	25.5	N	19	103
Dv	F	25.5	N	19	104
Dv	F	35.1	N	20	105
Dv	F	16.1	N	20	106
Dv	F	12.8	N	20	107
Dv	F	36.2	C	1	108
Dv	F	36.2	C	1	109
Dv	F	29.5	C	1	110
Dv	F	36.5	C	2	111
Dv	F	11.1	C	2	112
Dv	F	32.2	C	2	113
Dv	F	25.6	C	2	114
Dv	F	24.1	C	2	115
Dv	F	34.6	C	3	116
Dv	F	38.3	C	3	117
Dv	F	11.5	C	3	118
Dv	F	25.9	C	3	119
Dv	F	25.9	C	3	120
Dv	F	23.8	C	3	121
Dv	F	36.5	C	4	122
Dv	F	36.5	C	4	123
Dv	F	10	C	4	124
Dv	F	10	C	4	125
Dv	F	24.2	C	4	126
Dv	F	23.5	C	4	127
Dv	F	36.5	C	4	128
Dv	F	10	C	4	129
Dv	F	10	C	4	130
Dv	F	10	C	4	131
Dv	F	32.8	C	4	132
Dv	F	32.8	C	4	133
Dv	F	35.9	C	5	134
Dv	F	35.9	C	5	135
Dv	F	35.9	C	5	136
Dv	F	35.9	C	5	137
Dv	F	35.9	C	5	138
Dv	F	11.3	C	5	139
Dv	F	15.3	C	5	140
Dv	F	9.6	C	6	141
Dv	F	34.2	C	6	142
Dv	F	30.9	C	6	143
Dv	F	24.3	C	6	144
Dv	F	12.7	C	6	145
Dv	F	35.6	C	7	146
Dv	F	35.6	C	7	147
Dv	F	35.6	C	7	148
Dv	F	33.9	C	7	149
Dv	F	30.1	C	7	150
Dv	F	22.9	C	7	151
Dv	F	31.1	C	8	152
Dv	F	26.6	C	8	153
Dv	F	13.8	C	8	154
Dv	F	33.8	C	9	155
Dv	F	33.8	C	9	156
Dv	F	33.8	C	9	157
Dv	F	33.8	C	9	158
Dv	F	23.2	C	9	159
Dv	F	34.3	C	10	160
Dv	F	34.3	C	10	161
Dv	F	11.2	C	10	162
Dv	F	34.3	C	10	163
Dv	F	34.3	C	10	164
Dv	F	34.3	C	10	165
Dv	F	34.3	C	10	166
Dv	F	34.3	C	10	167
Dv	F	34.3	C	10	168
Dv	F	26.5	C	10	169
Dv	F	33.5	C	11	170
Dv	F	29.1	C	11	171
Dv	F	21.3	C	11	172
Dv	F	29.1	C	11	173
Dv	F	21.3	C	11	174
Dv	F	14.3	C	11	175
Dv	F	14.3	C	11	176
Dv	F	14.3	C	11	177
Dv	F	35.2	C	12	178
Dv	F	35.2	C	12	179
Dv	F	35.2	C	12	180
Dv	F	35.2	C	12	181
Dv	F	9.8	C	12	182
Dv	F	9.8	C	12	183
Dv	F	24.8	C	12	184
Dv	F	19.2	C	12	185
Dv	F	33	C	13	186
Dv	F	33	C	13	187
Dv	F	33	C	13	188
Dv	F	33	C	13	189
Dv	F	33	C	13	190
Dv	F	28.7	C	13	191
Dv	F	13.4	C	13	192
Dv	F	35.5	C	14	193
Dv	F	35.5	C	14	194
Dv	F	35.5	C	14	195
Dv	F	35.5	C	14	196
Dv	F	35.5	C	14	197
Dv	F	35.5	C	14	198
Dv	F	35.5	C	14	199
Dv	F	32.9	C	15	200
Dv	F	13.3	C	15	201
Dv	F	13.3	C	15	202
Dv	F	13.3	C	15	203
Dv	F	35.2	C	16	204
Dv	F	35.2	C	16	205
Dv	F	35.2	C	16	206
Dv	F	35.2	C	16	207
Dv	F	35.2	C	16	208
Dv	F	13.1	C	16	209
Dv	F	32.8	C	17	210
Dv	F	13.4	C	17	211
Dv	F	32.8	C	17	212
Dv	F	32.8	C	17	213
Dv	F	25.8	C	17	214
Dv	F	25.8	C	17	215
Dv	F	23.3	C	17	216
Dv	F	13.4	C	17	217
Dv	F	35.3	C	9	218
Dv	F	35.3	C	9	219
Dv	F	35.3	C	18	220
Dv	F	35.3	C	18	221
Dv	F	26.3	C	18	222
Dv	F	35.3	C	1	223
Dv	F	35.3	C	18	224
Dv	F	35.3	C	18	225
Dv	F	26.3	C	7	226
Dv	F	24	C	7	227
Dv	F	32.3	C	19	228
Dv	F	28.4	C	19	229
Dv	F	25.5	C	19	230
Dv	F	32.3	C	19	231
Dv	F	28.4	C	19	232
Dv	F	25.5	C	19	233
Dv	F	17.2	C	19	234
Dv	F	35.1	C	20	235
Dv	F	35.1	C	20	236
Dv	F	9.1	C	20	237
Dv	F	25	C	20	238
Dv	F	25	C	20	239
Dv	F	25	C	20	240
Dv	F	16.1	C	20	241
Dv	F	12.8	C	20	242
Dv	M	29.5	N	1	243
Dv	M	29.5	N	1	244
Dv	M	29.5	N	1	245
Dv	M	29.5	N	1	246
Dv	M	24	N	1	247
Dv	M	15.2	N	1	248
Dv	M	15.2	N	1	249
Dv	M	15.2	N	1	250
Dv	M	36.5	N	2	251
Dv	M	36.5	N	2	252
Dv	M	11.1	N	2	253
Dv	M	11.1	N	2	254
Dv	M	11.1	N	2	255
Dv	M	11.1	N	2	256
Dv	M	11.1	N	2	257
Dv	M	11.1	N	2	258
Dv	M	15.6	N	2	259
Dv	M	11.5	N	3	260
Dv	M	11.5	N	3	261
Dv	M	11.5	N	3	262
Dv	M	11.5	N	3	263
Dv	M	11.5	N	3	264
Dv	M	11.5	N	3	265
Dv	M	34.6	N	3	266
Dv	M	29	N	3	267
Dv	M	29	N	3	268
Dv	M	29	N	3	269
Dv	M	23.8	N	3	270
Dv	M	15.8	N	3	271
Dv	M	10	N	4	272
Dv	M	10	N	4	273
Dv	M	35.9	N	5	274
Dv	M	35.9	N	5	275
Dv	M	35.9	N	5	276
Dv	M	35.9	N	5	277
Dv	M	11.3	N	5	278
Dv	M	11.3	N	5	279
Dv	M	11.3	N	5	280
Dv	M	30.9	N	5	281
Dv	M	30.9	N	5	282
Dv	M	15.3	N	5	283
Dv	M	15.3	N	5	284
Dv	M	9.6	N	6	285
Dv	M	9.6	N	6	286
Dv	M	9.6	N	6	287
Dv	M	9.6	N	6	288
Dv	M	9.6	N	6	289
Dv	M	9.6	N	6	290
Dv	M	9.6	N	6	291
Dv	M	30.9	N	6	292
Dv	M	19.7	N	6	293
Dv	M	18.9	N	6	294
Dv	M	18.9	N	6	295
Dv	M	12.7	N	6	296
Dv	M	35.6	N	7	297
Dv	M	35.6	N	7	298
Dv	M	33.9	N	7	299
Dv	M	30.1	N	7	300
Dv	M	30.1	N	7	301
Dv	M	20.7	N	7	302
Dv	M	20.7	N	7	303
Dv	M	20.7	N	7	304
Dv	M	15.3	N	7	305
Dv	M	15.3	N	7	306
Dv	M	34	N	8	307
Dv	M	11.2	N	8	308
Dv	M	11.2	N	8	309
Dv	M	11.2	N	8	310
Dv	M	11.2	N	8	311
Dv	M	11.2	N	8	312
Dv	M	11.2	N	8	313
Dv	M	11.2	N	8	314
Dv	M	31.1	N	8	315
Dv	M	26.6	N	8	316
Dv	M	18.5	N	8	317
Dv	M	18.5	N	8	318
Dv	M	13.8	N	8	319
Dv	M	33.8	N	9	320
Dv	M	33.8	N	9	321
Dv	M	11	N	9	322
Dv	M	11	N	9	323
Dv	M	11	N	9	324
Dv	M	32.7	N	9	325
Dv	M	29.1	N	9	326
Dv	M	29.1	N	9	327
Dv	M	29.1	N	9	328
Dv	M	29.1	N	9	329
Dv	M	29.1	N	9	330
Dv	M	21.1	N	9	331
Dv	M	21.1	N	9	332
Dv	M	34.3	N	10	333
Dv	M	34.3	N	10	334
Dv	M	11.2	N	10	335
Dv	M	11.2	N	10	336
Dv	M	26.5	N	10	337
Dv	M	26.5	N	10	338
Dv	M	23.5	N	10	339
Dv	M	33.5	N	11	340
Dv	M	21.3	N	11	341
Dv	M	14.3	N	11	342
Dv	M	14.3	N	11	343
Dv	M	35.2	N	12	344
Dv	M	27.1	N	12	345
Dv	M	19.2	N	12	346
Dv	M	33	N	13	347
Dv	M	33	N	13	348
Dv	M	28.7	N	13	349
Dv	M	28.7	N	13	350
Dv	M	28.7	N	13	351
Dv	M	23.4	N	13	352
Dv	M	23.4	N	13	353
Dv	M	23.4	N	13	354
Dv	M	13.4	N	13	355
Dv	M	13.4	N	13	356
Dv	M	13.4	N	13	357
Dv	M	13.4	N	13	358
Dv	M	13.4	N	13	359
Dv	M	35.5	N	14	360
Dv	M	35.5	N	14	361
Dv	M	35.5	N	14	362
Dv	M	9.2	N	14	363
Dv	M	26.8	N	14	364
Dv	M	24.6	N	14	365
Dv	M	24.6	N	14	366
Dv	M	13	N	14	367
Dv	M	13	N	14	368
Dv	M	32.9	N	15	369
Dv	M	32.9	N	15	370
Dv	M	32.9	N	15	371
Dv	M	32.9	N	15	372
Dv	M	25.5	N	15	373
Dv	M	20.7	N	15	374
Dv	M	18.6	N	15	375
Dv	M	18.6	N	15	376
Dv	M	13.3	N	15	377
Dv	M	13.3	N	15	378
Dv	M	13.3	N	15	379
Dv	M	13.3	N	15	380
Dv	M	13.3	N	15	381
Dv	M	13.3	N	15	382
Dv	M	35.2	N	16	383
Dv	M	35.2	N	16	384
Dv	M	35.2	N	16	385
Dv	M	13.1	N	16	386
Dv	M	13.1	N	16	387
Dv	M	13.1	N	16	388
Dv	M	13.1	N	16	389
Dv	M	13.1	N	16	390
Dv	M	32.8	N	17	391
Dv	M	32.8	N	17	392
Dv	M	32.8	N	17	393
Dv	M	32.8	N	17	394
Dv	M	31.6	N	17	395
Dv	M	31.6	N	17	396
Dv	M	23.3	N	17	397
Dv	M	23.3	N	17	398
Dv	M	13.4	N	17	399
Dv	M	35.3	N	18	400
Dv	M	9.1	N	18	401
Dv	M	9.1	N	18	402
Dv	M	9.1	N	18	403
Dv	M	9.1	N	18	404
Dv	M	26.3	N	18	405
Dv	M	26.3	N	18	406
Dv	M	26.3	N	18	407
Dv	M	26.3	N	18	408
Dv	M	24	N	18	409
Dv	M	18.7	N	18	410
Dv	M	18.7	N	18	411
Dv	M	32.3	N	19	412
Dv	M	28.4	N	19	413
Dv	M	28.4	N	19	414
Dv	M	28.4	N	19	415
Dv	M	25.5	N	19	416
Dv	M	25.5	N	19	417
Dv	M	17.2	N	19	418
Dv	M	17.2	N	19	419
Dv	M	35.1	N	20	420
Dv	M	35.1	N	20	421
Dv	M	35.1	N	20	422
Dv	M	9.1	N	20	423
Dv	M	36.2	C	1	424
Dv	M	10.8	C	1	425
Dv	M	10.8	C	1	426
Dv	M	31.8	C	1	427
Dv	M	29.5	C	1	428
Dv	M	29.5	C	1	429
Dv	M	21.6	C	1	430
Dv	M	20.2	C	1	431
Dv	M	15.2	C	1	432
Dv	M	15.2	C	1	433
Dv	M	36.5	C	2	434
Dv	M	36.5	C	2	435
Dv	M	36.5	C	2	436
Dv	M	11.1	C	2	437
Dv	M	11.1	C	2	438
Dv	M	11.1	C	2	439
Dv	M	11.1	C	2	440
Dv	M	32.2	C	2	441
Dv	M	32.2	C	2	442
Dv	M	18	C	2	443
Dv	M	38.3	C	3	444
Dv	M	38.3	C	3	445
Dv	M	38.3	C	3	446
Dv	M	11.5	C	3	447
Dv	M	11.5	C	3	448
Dv	M	34.6	C	3	449
Dv	M	34.6	C	3	450
Dv	M	29	C	3	451
Dv	M	15.8	C	3	452
Dv	M	36.5	C	4	453
Dv	M	10	C	4	454
Dv	M	10	C	4	455
Dv	M	10	C	4	456
Dv	M	10	C	4	457
Dv	M	10	C	4	458
Dv	M	10	C	4	459
Dv	M	10	C	4	460
Dv	M	32.8	C	4	461
Dv	M	32.8	C	4	462
Dv	M	32.8	C	4	463
Dv	M	32.8	C	4	464
Dv	M	19.4	C	4	465
Dv	M	19.4	C	4	466
Dv	M	19.4	C	4	467
Dv	M	19.4	C	4	468
Dv	M	35.9	C	5	469
Dv	M	35.9	C	5	470
Dv	M	35.9	C	5	471
Dv	M	11.3	C	5	472
Dv	M	30.9	C	5	473
Dv	M	30.9	C	5	474
Dv	M	9.6	C	6	475
Dv	M	9.6	C	6	476
Dv	M	9.6	C	6	477
Dv	M	30.9	C	6	478
Dv	M	30.9	C	6	479
Dv	M	25.3	C	6	480
Dv	M	24.3	C	6	481
Dv	M	24.3	C	6	482
Dv	M	33.9	C	7	483
Dv	M	30.1	C	7	484
Dv	M	30.1	C	7	485
Dv	M	30.1	C	7	486
Dv	M	25.4	C	7	487
Dv	M	15.3	C	7	488
Dv	M	15.3	C	7	489
Dv	M	11.2	C	8	490
Dv	M	31.1	C	8	491
Dv	M	31.1	C	8	492
Dv	M	23.2	C	8	493
Dv	M	33.8	C	9	494
Dv	M	33.8	C	9	495
Dv	M	11	C	9	496
Dv	M	11	C	9	497
Dv	M	29.1	C	9	498
Dv	M	29.1	C	9	499
Dv	M	34.3	C	10	500
Dv	M	34.3	C	10	501
Dv	M	34.3	C	10	502
Dv	M	34.3	C	10	503
Dv	M	34.3	C	10	504
Dv	M	34.3	C	10	505
Dv	M	11.2	C	10	506
Dv	M	26.5	C	10	507
Dv	M	33.5	C	11	508
Dv	M	33.5	C	11	509
Dv	M	33.5	C	11	510
Dv	M	33.5	C	11	511
Dv	M	29.1	C	11	512
Dv	M	29.1	C	11	513
Dv	M	29.1	C	11	514
Dv	M	29.1	C	11	515
Dv	M	29.1	C	11	516
Dv	M	29.1	C	11	517
Dv	M	21.3	C	11	518
Dv	M	21.3	C	11	519
Dv	M	21.3	C	11	520
Dv	M	14.3	C	11	521
Dv	M	14.3	C	11	522
Dv	M	14.3	C	11	523
Dv	M	35.2	C	12	524
Dv	M	35.2	C	12	525
Dv	M	35.2	C	12	526
Dv	M	35.2	C	12	527
Dv	M	35.2	C	12	528
Dv	M	35.2	C	12	529
Dv	M	9.8	C	12	530
Dv	M	9.8	C	12	531
Dv	M	9.8	C	12	532
Dv	M	9.8	C	12	533
Dv	M	9.8	C	12	534
Dv	M	9.8	C	12	535
Dv	M	27.1	C	12	536
Dv	M	27.1	C	12	537
Dv	M	27.1	C	12	538
Dv	M	24.8	C	12	539
Dv	M	19.2	C	12	540
Dv	M	19.2	C	12	541
Dv	M	33	C	13	542
Dv	M	28.7	C	13	543
Dv	M	13.4	C	13	544
Dv	M	35.5	C	14	545
Dv	M	35.5	C	14	546
Dv	M	35.5	C	14	547
Dv	M	9.2	C	14	548
Dv	M	26.8	C	14	549
Dv	M	26.8	C	14	550
Dv	M	13	C	14	551
Dv	M	25.5	C	15	552
Dv	M	25.5	C	15	553
Dv	M	13.3	C	15	554
Dv	M	13.3	C	15	555
Dv	M	35.2	C	16	556
Dv	M	35.2	C	16	557
Dv	M	35.2	C	16	558
Dv	M	35.2	C	16	559
Dv	M	24.5	C	16	560
Dv	M	13.1	C	16	561
Dv	M	32.8	C	17	562
Dv	M	32.8	C	17	563
Dv	M	32.8	C	17	564
Dv	M	32.8	C	17	565
Dv	M	31.6	C	17	566
Dv	M	25.8	C	17	567
Dv	M	23.3	C	17	568
Dv	M	13.4	C	17	569
Dv	M	13.4	C	17	570
Dv	M	35.3	C	18	571
Dv	M	35.3	C	18	572
Dv	M	35.3	C	18	573
Dv	M	35.3	C	18	574
Dv	M	35.3	C	18	575
Dv	M	35.3	C	18	576
Dv	M	26.3	C	18	577
Dv	M	26.3	C	18	578
Dv	M	24	C	18	579
Dv	M	18.7	C	18	580
Dv	M	32.3	C	19	581
Dv	M	32.3	C	19	582
Dv	M	32.3	C	19	583
Dv	M	25.5	C	19	584
Dv	M	17.2	C	19	585
Dv	M	35.1	C	20	586
Dv	M	35.1	C	20	587
Dv	M	35.1	C	20	588
Dv	M	35.1	C	20	589
Dv	M	35.1	C	20	590
Dv	M	35.1	C	20	591
Dv	M	35.1	C	20	592
Dv	M	35.1	C	20	593
Dv	M	35.1	C	20	594
Dv	M	35.1	C	20	595
Dv	M	35.1	C	20	596
Dv	M	35.1	C	20	597
Dv	M	25	C	20	598
Dv	M	25	C	20	599
Dv	M	25	C	20	600
Dh	F	32.3	C	1	1
Dh	F	32.3	C	1	2
Dh	F	20.9	C	1	3
Dh	F	34.6	C	2	4
Dh	F	33.4	C	3	5
Dh	F	23.9	C	3	6
Dh	F	21	C	3	7
Dh	F	20.3	C	4	8
Dh	F	21.2	C	5	9
Dh	F	21.2	C	5	10
Dh	F	26.9	C	8	11
Dh	F	17.1	C	8	12
Dh	F	12.2	C	8	13
Dh	F	5.4	C	8	14
Dh	F	34	C	9	15
Dh	F	26.7	C	9	16
Dh	F	17.6	C	9	17
Dh	F	25	C	10	18
Dh	F	21.3	C	10	19
Dh	F	32.9	C	11	20
Dh	F	25.1	C	11	21
Dh	F	11.4	C	11	22
Dh	F	22.3	C	12	23
Dh	F	24.1	C	12	24
Dh	F	19.5	C	12	25
Dh	F	19.5	C	12	26
Dh	F	17.8	C	13	27
Dh	F	19.5	C	13	28
Dh	F	31.3	C	14	29
Dh	F	24.1	C	14	30
Dh	F	20.5	C	14	31
Dh	F	32	C	16	32
Dh	F	14.2	C	16	33
Dh	F	8.1	C	18	34
Dh	F	29.2	C	20	35
Dh	F	20.9	Db	1	36
Dh	F	34.6	Db	2	37
Dh	F	34.6	Db	2	38
Dh	F	4.9	Db	2	39
Dh	F	23.9	Db	3	40
Dh	F	33.2	Db	5	41
Dh	F	25.6	Db	5	42
Dh	F	27.9	Db	6	43
Dh	F	26.8	Db	6	44
Dh	F	26.8	Db	6	45
Dh	F	19.1	Db	6	46
Dh	F	19.1	Db	6	47
Dh	F	25.2	Db	7	48
Dh	F	5.8	Db	7	49
Dh	F	33.8	Db	10	50
Dh	F	25.1	Db	11	51
Dh	F	33	Db	12	52
Dh	F	11.1	Db	12	53
Dh	F	33	Db	13	54
Dh	F	33	Db	13	55
Dh	F	33	Db	13	56
Dh	F	32	Db	15	57
Dh	F	14.5	Db	15	58
Dh	F	32	Db	16	59
Dh	F	32.2	Db	18	60
Dh	F	29.1	Db	18	61
Dh	F	26.1	Db	19	62
Dh	F	32.3	Dm	1	63
Dh	F	34.6	Dm	2	64
Dh	F	34.6	Dm	2	65
Dh	F	34.6	Dm	2	66
Dh	F	19.1	Dm	6	67
Dh	F	19.1	Dm	6	68
Dh	F	33.1	Dm	7	69
Dh	F	12.2	Dm	8	70
Dh	F	26.7	Dm	9	71
Dh	F	33.8	Dm	10	72
Dh	F	21.3	Dm	10	73
Dh	F	33	Dm	12	74
Dh	F	24.1	Dm	12	75
Dh	F	33	Dm	13	76
Dh	F	19.5	Dm	13	77
Dh	F	24	Dm	15	78
Dh	F	24	Dm	15	79
Dh	F	39.6	Dm	17	80
Dh	F	22.8	Dm	17	81
Dh	F	29.1	Dm	18	82
Dh	F	26.1	Dm	19	83
Dh	F	26.5	Dm	20	84
Dh	F	32.3	N	1	85
Dh	F	32.3	N	1	86
Dh	F	32.3	N	1	87
Dh	F	32.3	N	1	88
Dh	F	24.2	N	1	89
Dh	F	20.9	N	1	90
Dh	F	20.9	N	1	91
Dh	F	34.6	N	2	92
Dh	F	34.6	N	2	93
Dh	F	34.6	N	2	94
Dh	F	34.6	N	2	95
Dh	F	34.6	N	2	96
Dh	F	19.9	N	2	97
Dh	F	19.9	N	2	98
Dh	F	19.9	N	2	99
Dh	F	4.9	N	2	100
Dh	F	4.9	N	2	101
Dh	F	33.4	N	3	102
Dh	F	33.4	N	3	103
Dh	F	33.4	N	3	104
Dh	F	33.4	N	3	105
Dh	F	23.9	N	3	106
Dh	F	23.9	N	3	107
Dh	F	23.9	N	3	108
Dh	F	23.9	N	3	109
Dh	F	21	N	3	110
Dh	F	30	N	4	111
Dh	F	30	N	4	112
Dh	F	30	N	4	113
Dh	F	30	N	4	114
Dh	F	20.3	N	4	115
Dh	F	20.3	N	4	116
Dh	F	20.3	N	4	117
Dh	F	20.3	N	4	118
Dh	F	18	N	4	119
Dh	F	18	N	4	120
Dh	F	18	N	4	121
Dh	F	4.3	N	4	122
Dh	F	33.2	N	5	123
Dh	F	33.2	N	5	124
Dh	F	33.2	N	5	125
Dh	F	33.2	N	5	126
Dh	F	33.2	N	5	127
Dh	F	33.2	N	5	128
Dh	F	25.6	N	5	129
Dh	F	25.6	N	5	130
Dh	F	25.6	N	5	131
Dh	F	25.6	N	5	132
Dh	F	21.2	N	5	133
Dh	F	27.9	N	5	134
Dh	F	27.9	N	6	135
Dh	F	24.3	N	6	136
Dh	F	24.3	N	6	137
Dh	F	24.3	N	6	138
Dh	F	19.1	N	6	139
Dh	F	33.1	N	7	140
Dh	F	33.1	N	7	141
Dh	F	33.1	N	7	142
Dh	F	25.2	N	7	143
Dh	F	25.2	N	7	144
Dh	F	21.5	N	7	145
Dh	F	17.1	N	7	146
Dh	F	5.8	N	7	147
Dh	F	34.3	N	8	148
Dh	F	34.3	N	8	149
Dh	F	34.3	N	8	150
Dh	F	34.3	N	8	151
Dh	F	26.9	N	8	152
Dh	F	26.9	N	8	153
Dh	F	26.9	N	8	154
Dh	F	26.9	N	8	155
Dh	F	21	N	8	156
Dh	F	21	N	8	157
Dh	F	21	N	8	158
Dh	F	12.2	N	8	159
Dh	F	34	N	9	160
Dh	F	34	N	9	161
Dh	F	34	N	9	162
Dh	F	34	N	9	163
Dh	F	26.7	N	9	164
Dh	F	26.7	N	9	165
Dh	F	17.6	N	9	166
Dh	F	17.6	N	9	167
Dh	F	11.4	N	9	168
Dh	F	11.4	N	9	169
Dh	F	11.4	N	9	170
Dh	F	3.5	N	9	171
Dh	F	33.8	N	10	172
Dh	F	33.8	N	10	173
Dh	F	33.8	N	10	174
Dh	F	26.5	N	10	175
Dh	F	26.5	N	10	176
Dh	F	26.5	N	10	177
Dh	F	21.3	N	10	178
Dh	F	21.3	N	10	179
Dh	F	17.4	N	10	180
Dh	F	17.4	N	10	181
Dh	F	32.9	N	11	182
Dh	F	32.9	N	11	183
Dh	F	26.2	N	11	184
Dh	F	26.2	N	11	185
Dh	F	26.2	N	11	186
Dh	F	25.1	N	11	187
Dh	F	17.7	N	11	188
Dh	F	17.7	N	11	189
Dh	F	3.1	N	11	190
Dh	F	33	N	12	191
Dh	F	33	N	12	192
Dh	F	33	N	12	193
Dh	F	33	N	12	194
Dh	F	33	N	12	195
Dh	F	33	N	12	196
Dh	F	22.3	N	12	197
Dh	F	22.3	N	12	198
Dh	F	22.3	N	12	199
Dh	F	24.1	N	12	200
Dh	F	19.5	N	12	201
Dh	F	5.2	N	12	202
Dh	F	33	N	13	203
Dh	F	33	N	13	204
Dh	F	33	N	13	205
Dh	F	22.1	N	13	206
Dh	F	22.1	N	13	207
Dh	F	19.5	N	13	208
Dh	F	19.5	N	13	209
Dh	F	11.6	N	13	210
Dh	F	31.3	N	14	211
Dh	F	31.3	N	14	212
Dh	F	31.3	N	14	213
Dh	F	31.3	N	14	214
Dh	F	31.3	N	14	215
Dh	F	31.3	N	14	216
Dh	F	31.3	N	14	217
Dh	F	31.3	N	14	218
Dh	F	31.3	N	14	219
Dh	F	24.1	N	14	220
Dh	F	24.1	N	14	221
Dh	F	32	N	15	222
Dh	F	32	N	15	223
Dh	F	32	N	15	224
Dh	F	32	N	15	225
Dh	F	24	N	15	226
Dh	F	24	N	15	227
Dh	F	24	N	15	228
Dh	F	24	N	15	229
Dh	F	21.1	N	15	230
Dh	F	14.5	N	15	231
Dh	F	32	N	16	232
Dh	F	32	N	16	233
Dh	F	32	N	16	234
Dh	F	32	N	16	235
Dh	F	32	N	16	236
Dh	F	32	N	16	237
Dh	F	32	N	16	238
Dh	F	32	N	16	239
Dh	F	28	N	16	240
Dh	F	19.1	N	16	241
Dh	F	19.1	N	16	242
Dh	F	20.3	N	16	243
Dh	F	14.2	N	16	244
Dh	F	39.6	N	17	245
Dh	F	39.6	N	17	246
Dh	F	39.6	N	17	247
Dh	F	39.6	N	17	248
Dh	F	39.6	N	17	249
Dh	F	22.8	N	17	250
Dh	F	20.9	N	17	251
Dh	F	20.9	N	17	252
Dh	F	20.9	N	17	253
Dh	F	20.9	N	17	254
Dh	F	16.2	N	17	255
Dh	F	16.2	N	17	256
Dh	F	16.2	N	17	257
Dh	F	16.2	N	17	258
Dh	F	16.2	N	17	259
Dh	F	16.2	N	17	260
Dh	F	16.2	N	17	261
Dh	F	32.2	N	18	262
Dh	F	30.4	N	18	263
Dh	F	30.4	N	18	264
Dh	F	26.3	N	18	265
Dh	F	26.3	N	18	266
Dh	F	26.3	N	18	267
Dh	F	26.3	N	18	268
Dh	F	26.3	N	18	269
Dh	F	26.3	N	18	270
Dh	F	26.3	N	18	271
Dh	F	28.1	N	19	272
Dh	F	26.1	N	19	273
Dh	F	26.1	N	19	274
Dh	F	26.1	N	19	275
Dh	F	26.1	N	19	276
Dh	F	26.1	N	19	277
Dh	F	26.1	N	19	278
Dh	F	26.1	N	19	279
Dh	F	26.1	N	19	280
Dh	F	26.1	N	19	281
Dh	F	26.1	N	19	282
Dh	F	26.1	N	19	283
Dh	F	29.2	N	20	284
Dh	F	29.2	N	20	285
Dh	F	26.5	N	20	286
Dh	F	26.5	N	20	287
Dh	F	26.5	N	20	288
Dh	F	23.1	N	20	289
Dh	F	21.3	N	20	290
Dh	F	21.3	N	20	291
Dh	F	17.8	N	20	292
Dh	F	17.8	N	20	293
Dh	F	17.8	N	20	294
Dh	F	17.8	N	20	295
Dh	F	6.8	N	20	296
Dh	M	20.9	C	1	297
Dh	M	19.9	C	2	298
Dh	M	23.9	C	3	299
Dh	M	20.3	C	4	300
Dh	M	17.5	C	4	301
Dh	M	17.5	C	4	302
Dh	M	4.3	C	4	303
Dh	M	21.2	C	5	304
Dh	M	27.9	C	6	305
Dh	M	24.3	C	6	306
Dh	M	19.1	C	6	307
Dh	M	34	C	9	308
Dh	M	32.9	C	11	309
Dh	M	32.9	C	11	310
Dh	M	22.3	C	12	311
Dh	M	24.1	C	12	312
Dh	M	33	C	13	313
Dh	M	33	C	13	314
Dh	M	17.8	C	13	315
Dh	M	24.1	C	14	316
Dh	M	24.1	C	14	317
Dh	M	24.2	Db	1	318
Dh	M	20.3	Db	4	319
Dh	M	18	Db	4	320
Dh	M	4.3	Db	4	321
Dh	M	33.2	Db	5	322
Dh	M	18.1	Db	5	323
Dh	M	5	Db	6	324
Dh	M	18.7	Db	7	325
Dh	M	34.3	Db	8	326
Dh	M	26.7	Db	9	327
Dh	M	17.4	Db	10	328
Dh	M	12	Db	15	329
Dh	M	32	Db	16	330
Dh	M	22.8	Db	17	331
Dh	M	29.1	Db	18	332
Dh	M	28.1	Db	19	333
Dh	M	32.3	Dm	1	334
Dh	M	32.3	Dm	1	335
Dh	M	19.9	Dm	2	336
Dh	M	20.3	Dm	4	337
Dh	M	25.6	Dm	5	338
Dh	M	20.2	Dm	7	339
Dh	M	21.5	Dm	7	340
Dh	M	17.1	Dm	8	341
Dh	M	17.6	Dm	9	342
Dh	M	17.6	Dm	9	343
Dh	M	33.8	Dm	10	344
Dh	M	32.9	Dm	11	345
Dh	M	26.2	Dm	11	346
Dh	M	24.1	Dm	14	347
Dh	M	32	Dm	15	348
Dh	M	24	Dm	15	349
Dh	M	21.1	Dm	15	350
Dh	M	14.5	Dm	15	351
Dh	M	32	Dm	16	352
Dh	M	17.8	Dm	20	353
Dh	M	32.3	N	1	354
Dh	M	32.3	N	1	355
Dh	M	32.3	N	1	356
Dh	M	32.3	N	1	357
Dh	M	24.2	N	1	358
Dh	M	24.2	N	1	359
Dh	M	24.2	N	1	360
Dh	M	24.2	N	1	361
Dh	M	5.5	N	1	362
Dh	M	34.6	N	2	363
Dh	M	34.6	N	2	364
Dh	M	34.6	N	2	365
Dh	M	34.6	N	2	366
Dh	M	34.6	N	2	367
Dh	M	34.6	N	2	368
Dh	M	34.6	N	2	369
Dh	M	19.9	N	2	370
Dh	M	19.9	N	2	371
Dh	M	33.4	N	3	372
Dh	M	33.4	N	3	373
Dh	M	33.4	N	3	374
Dh	M	33.4	N	3	375
Dh	M	33.4	N	3	376
Dh	M	23.9	N	3	377
Dh	M	23.9	N	3	378
Dh	M	23.9	N	3	379
Dh	M	21	N	3	380
Dh	M	21	N	3	381
Dh	M	21	N	3	382
Dh	M	21	N	3	383
Dh	M	15.9	N	3	384
Dh	M	15.9	N	3	385
Dh	M	13.9	N	3	386
Dh	M	13.9	N	3	387
Dh	M	30	N	4	388
Dh	M	30	N	4	389
Dh	M	20.3	N	4	390
Dh	M	20.3	N	4	391
Dh	M	17.5	N	4	392
Dh	M	17.5	N	4	393
Dh	M	17.5	N	4	394
Dh	M	18	N	4	395
Dh	M	33.2	N	5	396
Dh	M	33.2	N	5	397
Dh	M	25.6	N	5	398
Dh	M	21.2	N	5	399
Dh	M	21.2	N	5	400
Dh	M	21.2	N	5	401
Dh	M	21.2	N	5	402
Dh	M	21.2	N	5	403
Dh	M	21.2	N	5	404
Dh	M	18.1	N	5	405
Dh	M	24.3	N	6	406
Dh	M	19.1	N	6	407
Dh	M	19.1	N	6	408
Dh	M	19.1	N	6	409
Dh	M	19.1	N	6	410
Dh	M	10.8	N	6	411
Dh	M	10.8	N	6	412
Dh	M	5	N	6	413
Dh	M	5	N	6	414
Dh	M	33.1	N	7	415
Dh	M	33.1	N	7	416
Dh	M	33.1	N	7	417
Dh	M	25.2	N	7	418
Dh	M	25.2	N	7	419
Dh	M	20.2	N	7	420
Dh	M	20.2	N	7	421
Dh	M	20.2	N	7	422
Dh	M	21.5	N	7	423
Dh	M	21.5	N	7	424
Dh	M	21.5	N	7	425
Dh	M	17.1	N	7	426
Dh	M	18.7	N	7	427
Dh	M	5.8	N	7	428
Dh	M	34.3	N	8	429
Dh	M	26.9	N	8	430
Dh	M	21	N	8	431
Dh	M	21	N	8	432
Dh	M	17.8	N	8	433
Dh	M	17.1	N	8	434
Dh	M	17.1	N	8	435
Dh	M	5.4	N	8	436
Dh	M	34	N	9	437
Dh	M	26.7	N	9	438
Dh	M	26.7	N	9	439
Dh	M	26.7	N	9	440
Dh	M	17.6	N	9	441
Dh	M	11.4	N	9	442
Dh	M	11.4	N	9	443
Dh	M	11.4	N	9	444
Dh	M	3.5	N	9	445
Dh	M	33.8	N	10	446
Dh	M	33.8	N	10	447
Dh	M	33.8	N	10	448
Dh	M	33.8	N	10	449
Dh	M	33.8	N	10	450
Dh	M	33.8	N	10	451
Dh	M	26.5	N	10	452
Dh	M	26.5	N	10	453
Dh	M	25	N	10	454
Dh	M	25	N	10	455
Dh	M	25	N	10	456
Dh	M	21.3	N	10	457
Dh	M	17.4	N	10	458
Dh	M	32.9	N	11	459
Dh	M	32.9	N	11	460
Dh	M	32.9	N	11	461
Dh	M	26.2	N	11	462
Dh	M	25.1	N	11	463
Dh	M	25.1	N	11	464
Dh	M	25.1	N	11	465
Dh	M	17.7	N	11	466
Dh	M	17.7	N	11	467
Dh	M	17.7	N	11	468
Dh	M	11.4	N	11	469
Dh	M	11.4	N	11	470
Dh	M	3.1	N	11	471
Dh	M	22.3	N	12	472
Dh	M	22.3	N	12	473
Dh	M	24.1	N	12	474
Dh	M	24.1	N	12	475
Dh	M	19.5	N	12	476
Dh	M	19.5	N	12	477
Dh	M	19.5	N	12	478
Dh	M	11.1	N	12	479
Dh	M	11.1	N	12	480
Dh	M	5.2	N	12	481
Dh	M	33	N	13	482
Dh	M	33	N	13	483
Dh	M	33	N	13	484
Dh	M	17.8	N	13	485
Dh	M	17.8	N	13	486
Dh	M	11.6	N	13	487
Dh	M	11.6	N	13	488
Dh	M	31.3	N	14	489
Dh	M	31.3	N	14	490
Dh	M	31.3	N	14	491
Dh	M	31.3	N	14	492
Dh	M	24.1	N	14	493
Dh	M	24.1	N	14	494
Dh	M	20.5	N	14	495
Dh	M	20.5	N	14	496
Dh	M	20.5	N	14	497
Dh	M	11.3	N	14	498
Dh	M	11.3	N	14	499
Dh	M	11.3	N	14	500
Dh	M	32	N	15	501
Dh	M	24	N	15	502
Dh	M	21.1	N	15	503
Dh	M	21.1	N	15	504
Dh	M	21.1	N	15	505
Dh	M	14.5	N	15	506
Dh	M	14.5	N	15	507
Dh	M	14.5	N	15	508
Dh	M	12	N	15	509
Dh	M	32	N	16	510
Dh	M	32	N	16	511
Dh	M	32	N	16	512
Dh	M	32	N	16	513
Dh	M	32	N	16	514
Dh	M	19.1	N	16	515
Dh	M	20.3	N	16	516
Dh	M	14.2	N	16	517
Dh	M	14.2	N	16	518
Dh	M	14.2	N	16	519
Dh	M	39.6	N	17	520
Dh	M	39.6	N	17	521
Dh	M	39.6	N	17	522
Dh	M	22.8	N	17	523
Dh	M	22.8	N	17	524
Dh	M	22.8	N	17	525
Dh	M	22.8	N	17	526
Dh	M	22.8	N	17	527
Dh	M	32.2	N	18	528
Dh	M	30.4	N	18	529
Dh	M	29.1	N	18	530
Dh	M	29.1	N	18	531
Dh	M	26.3	N	18	532
Dh	M	26.3	N	18	533
Dh	M	26.3	N	18	534
Dh	M	26.3	N	18	535
Dh	M	26.3	N	18	536
Dh	M	26.3	N	18	537
Dh	M	8.1	N	18	538
Dh	M	8.1	N	18	539
Dh	M	8.1	N	18	540
Dh	M	8.1	N	18	541
Dh	M	8.1	N	18	542
Dh	M	28.1	N	19	543
Dh	M	28.1	N	19	544
Dh	M	26.1	N	19	545
Dh	M	26.1	N	19	546
Dh	M	26.1	N	19	547
Dh	M	26.1	N	19	548
Dh	M	26.1	N	19	549
Dh	M	26.1	N	19	550
Dh	M	26.1	N	19	551
Dh	M	26.1	N	19	552
Dh	M	26.1	N	19	553
Dh	M	6.1	N	19	554
Dh	M	34.1	N	20	555
Dh	M	34.1	N	20	556
Dh	M	26.5	N	20	557
Dh	M	26.5	N	20	558
Dh	M	26.5	N	20	559
Dh	M	26.5	N	20	560
Dh	M	26.5	N	20	561
Dh	M	26.5	N	20	562
Dh	M	23.1	N	20	563
Dh	M	21.3	N	20	564
Dh	M	17.8	N	20	565
Dh	M	17.8	N	20	566
Dh	M	17.8	N	20	567
Dh	M	17.8	N	20	568
	Dv-M	358		Dh-M	272
	Dv-F	242		Dh-F	296
	Dv-M-C	177		Dh-M-C	21
	Dv-F-C	135		Dh-F-C	35
	Dv-M-N	181		Dh-M-Dm	20
	Dv-F-N	107		Dh-F-Dm	22
				Dh-M-Db	16
				Dh-F-Db	27
				Dh-M-N	215
				Dh-F-N	212

## Sheet: Sex and Infection
DNA Sample	Sex	Temperature	Infection
IV/1.1	F	36.5	+		A jak to teraz przyporządkować do akwariów? - J
IV/1.2	F	36.5	+
IV/1.3	F	36.5	+
IV/1.4	M	36.5	+
IV/2.1	F	32.8	+
IV/2.2	F	32.8	+
IV/2.3	M	32.8	+
IV/2.4	M	32.8	+
IV/2.5	M	32.8	+
IV/2.6	M	32.8	+
IV/4.1	F	24.2	+
IV/5.1	F	23.5	+
IV/7.1	M	19.4	+
IV/7.2	M	19.4	+
IV/7.3	M	19.4	+
IV/7.4	M	19.4	+
IV/10.1	M	10
IV/10.2	M	10	+
IV/10.3	M	10	+
IV/10.4	M	10	+
IV/10.5	F	10	+
IV/10.6	M	10	+
IV/10.7	F	10	+
IV/10.8	M	10	+
IV/10.9	F	10	+
IV/10.10	F	10	+
IV/10.11	M	10	+
IV/10.12	M	10	+
IV/10.13	F	10	+
IV/10.14	M	10
XVIII/1.1	M	35.3	+
XVIII/1.2	F	35.3	+
XVIII/1.3	M	35.3
XVIII/1.4	F	35.3	+
XVIII/1.5	F	35.3	+
XVIII/1.6	F	35.3	+
XVIII/1.7	M	35.3	+
XVIII/1.8	M	35.3	+
XVIII/1.9	M	35.3	+
XVIII/1.10	M	35.3	+
XVIII/1.11	M	35.3	+
XVIII/1.12	F	35.3	+
XVIII/1.13	F	35.3	+
XVIII/1.14	F	35.3	+
XVIII/1.15	F	35.3
XVIII/3.1	M	26.3
XVIII/3.2	F	26.3	+
XVIII/3.3	F	26.3	+
XVIII/3.4	M	26.3	+
XVIII/3.5	M	26.3
XVIII/3.1	M	26.3	+
XVIII/3.2	F	26.3
XVIII/3.3	F	26.3
XVIII/3.4	M	26.3
XVIII/3.5	M	26.3
XVIII/5.1	M	24	+
XVIII/5.2	M	24
XVIII/5.3	F	24	+
XVIII/7.1	M	18.7	+
XVIII/7.2	M	18.7
XVIII/7.3	M	18.7
XVIII/10.1	M	9.1
XVIII/10.2	M	9.1
XVIII/10.3	M	9.1
XVIII/10.4	M	9.1
XII/1.1	M	35.2	+
XII/1.2	M	35.2	+
XII/1.3	F	35.2	+
XII/1.4	M	35.2
XII/1.5	M	35.2	+
XII/1.6	M	35.2	+
XII/1.7	M	35.2	+
XII/1.8	M	35.2	+
XII/1.9	F	35.2	+
XII/1.10	F	35.2	+
XII/1.11	F	35.2	+
XII/3.1	M	27.1	+
XII/3.2	M	27.1
XII/3.3	F	27.1
XII/3.4	M	27.1	+
XII/3.5	M	27.1	+
XII/5.1	M	24.8	+
XII/5.2	F	24.8	+
XII/7.1	M	19.2
XII/7.2	M	19.2	+
XII/7.3	F	19.2	+
XII/7.4	M	19.2	+
XII/10.1	M	9.8	+
XII/10.2	M	9.8	+
XII/10.3	M	9.8	+
XII/10.4	M	9.8	+
XII/10.5	M	9.8	+
XII/10.6	F	9.8	+
XII/10.7	M	9.8	+
XII/10.8	F	9.8	+
XVII/1.1	M	32.8	+
XVII/1.2	M	32.8	+
XVII/1.3	M	32.8
XVII/1.4	M	32.8
XVII/1.5	M	32.8	+
XVII/1.6	M	32.8	+
XVII/1.7	F	32.8	+
XVII/1.8	M	32.8
XVII/1.9	F	32.8
XVII/1.10	F	32.8	+
XVII/1.11	M	32.8
XVII/1.12	F	32.8	+
XVII/2.1	M	31.6
XVII/2.2	M	31.6
XVII/2.3	M	31.6	+
XVII/4.1	F	25.8
XVII/4.2	F	25.8	+
XVII/4.3	M	25.8	+
XVII/4.4	F	25.8	+
XVII/5.1	F	23.3
XVII/5.2	M	23.3	+
XVII/5.3	F	23.3
XVII/5.4	M	23.3
XVII/5.5	M	23.3
XVII/5.6	F	23.3	+
XVII/9.1	M	13.4
XVII/9.2	F	13.4	+
XVII/9.3	M	13.4	+
XVII/9.4	F	13.4	+
XVII/9.5	M	13.4	+
XI/1.1	F	33.5
XI/1.2	M	33.5	+
XI/1.3	F	33.5	+
XI/1.4	M	33.5	+
XI/1.5	M	33.5	+
XI/1.6	M	33.5	+
XI/1.7	M	33.5
XI/3.1	M	29.1	+
XI/3.2	M	29.1	+
XI/3.3	F	29.1	+
XI/3.4	M	29.1	+
XI/3.5	F	29.1	+
XI/3.6	M	29.1	+
XI/3.7	M	29.1	+
XI/3.8	M	29.1	+
XI/6.1	M	21.3
XI/6.2	M	21.3	+
XI/6.3	M	21.3	+
XI/6.4	F	21.3	+
XI/6.5	F	21.3
XI/6.6	F	21.3	+
XI/6.7	M	21.3	+
XI/9.1	F	14.3	+
XI/9.2	M	14.3	+
XI/9.3	M	14.3	+
XI/9.4	M	14.3
XI/9.5	M	14.3
XI/9.6	M	14.3	+
XI/9.7	F	14.3	+
XI/9.8	F	14.3	+
XX/1.1	M	35.1
XX/1.2	M	35.1	+
XX/1.3	M	35.1	+
XX/1.4	M	35.1	+
XX/1.5	F	35.1	+
XX/1.6	M	35.1
XX/1.7	M	35.1	+
XX/1.8	M	35.1	+
XX/1.9	M	35.1	+
XX/1.10	M	35.1	+
XX/1.11	M	35.1	+
XX/1.12	M	35.1	+
XX/1.13	M	35.1	+
XX/1.14	M	35.1
XX/1.15	M	35.1	+
XX/1.16	F	35.1
XX/1.17	M	35.1	+
XX/1.18	F	35.1	+
XX/4.1	F	25	+
XX/4.2	M	25	+
XX/4.3	M	25	+
XX/4.4	M	25	+
XX/4.5	F	25	+
XX/4.6	F	25	+
XX/8.1	F	16.1
XX/8.2	F	16.1	+
XX/9.1	F	12.8	+
XX/9.2	F	12.8
XX/10.1	M	9.1
XX/10.2	F	9.1	+
II/1.1	M	36.5
II/1.2	M	36.5
II/1.3	F	36.5
II/1.4	M	36.5
II/1.5	M	36.5
II/1.6	M	36.5
II/2.1	F	32.2
II/2.2	F	32.2
II/2.3	M	32.2
II/2.4	M	32.2
II/2.5	F	32.2
II/2.6	F	32.2
II/2.7	F	32.2
II/4.1	F	25.6
II/5.1	F	24.1
II/8.1	M	18
II/9.1	M	15.6
II/10.1	F	11.1
II/10.2	F	11.1
II/10.3	M	11.1
II/10.4	M	11.1
II/10.5	M	11.1
II/10.6	M	11.1
II/10.7	M	11.1
II/10.8	M	11.1
II/10.9	F	11.1
II/10.10	M	11.1
II/10.11	M	11.1
II/10.12	M	11.1
II/10.13	M	11.1
III/1.1	M	38.3
III/1.2	M	38.3
III/1.3	M	38.3
III/1.4	F	38.3
III/2.1	F	34.6
III/2.2	M	34.6
III/2.3	F	34.6
III/2.4	M	34.6
III/2.5	M	34.6
III/2.6	F	34.6
III/3.1	M	29
III/3.2	M	29
III/3.3	M	29
III/3.4	F	29
III/3.5	M	29
III/4.1	F	25.9
III/4.2	F	25.9
III/5.1	M	23.8
III/5.2	F	23.8
III/9.1	M	15.8
III/9.2	M	15.8
III/10.1	M	11.5
III/10.2	M	11.5
III/10.3	M	11.5
III/10.4	M	11.5
III/10.5	M	11.5
III/10.6	M	11.5
III/10.7	F	11.5
III/10.8	M	11.5
III/10.9	M	11.5
X/1.1	M	34.3	+
X/1.2	M	34.3
X/1.3	F	34.3	+
X/1.4	F	34.3	+
X/1.5	F	34.3	+
X/1.6	M	34.3	+
X/1.7	F	34.3	+
X/1.8	F	34.3	+
X/1.9	F	34.3	+
X/1.10	M	34.3	+
X/1.11	F	34.3
X/1.12	M	34.3
X/1.13	M	34.3	+
X/1.14	F	34.3
X/1.15	M	34.3	+
X/1.16	F	34.3	+
X/1.17	F	34.3	+
X/1.18	M	34.3	+
X/1.19	F	34.3
X/1.20	F	34.3
X/1.21	F	34.3
X/3.1	M	26.5
X/3.2	F	26.5	+
X/3.3	M	26.5	+
X/3.4	M	26.5
X/5.1	M	23.5
X/10.1	M	11.2
X/10.2	F	11.2	+
X/10.3	M	11.2
X/10.4	M	11.2	+
VI/1.1	F	34.2	+
VI/1.2	F	34.2
VI/2.1	F	30.9
VI/2.2	F	30.9
VI/2.3	M	30.9
VI/2.4	M	30.9	+
VI/2.5	M	30.9	+
VI/2.6	F	30.9	+
VI/3.1	M	25.3	+
VI/4.1	F	24.3	+
VI/4.2	M	24.3	+
VI/4.3	M	24.3	+
VI/6.1	M	19.7
VI/7.1	M	18.9
VI/7.2	M	18.9
VI/9.1	M	12.7
VI/9.2	F	12.7	+
VI/10.1	F	9.6	+
VI/10.2	M	9.6	+
VI/10.3	M	9.6
VI/10.4	M	9.6
VI/10.5	M	9.6
VI/10.6	M	9.6
VI/10.7	F	9.6
VI/10.8	M	9.6	+
VI/10.9	M	9.6
VI/10.10	M	9.6
VI/10.11	F	9.6
VI/10.12	M	9.6
VI/10.13	M	9.6	+
VII/1.1	F	35.6	+
VII/1.2	M	35.6
VII/1.3	F	35.6	+
VII/1.4	F	35.6	+
VII/1.5	F	35.6
VII/1.6	M	35.6
VII/2.1	F	33.9
VII/2.2	M	33.9
VII/2.3	M	33.9	+
VII/2.4	F	33.9
VII/2.5	F	33.9
VII/2.6	F	33.9	+
VII/3.1	M	30.1
VII/3.2	M	30.1	+
VII/3.3	F	30.1	+
VII/3.4	M	30.1	+
VII/3.5	M	30.1	+
VII/3.6	M	30.1
VII/5.1	M	25.4	+
VII/6.1	F	22.9	+
VII/7.1	M	20.7
VII/7.2	M	20.7
VII/7.3	M	20.7
VII/9.1	M	15.3
VII/9.2	M	15.3	+
VII/9.3	F	15.3
VII/9.4	M	15.3	+
VII/9.5	M	15.3
V/1.1	M	35.9
V/1.2	F	35.9
V/1.3	F	35.9
V/1.4	F	35.9
V/1.5	F	35.9	+
V/1.6	M	35.9	+
V/1.7	F	35.9
V/1.8	M	35.9	+
V/1.9	M	35.9
V/1.10	F	35.9	+
V/1.11	M	35.9
V/1.12	M	35.9
V/1.13	F	35.9
V/1.14	F	35.9	+
V/1.15	F	35.9
V/1.16	F	35.9
V/1.17	M	35.9
V/3.1	M	30.9
V/3.2	M	30.9
V/3.3	F	30.9
V/3.4	M	30.9	+
V/3.5	M	30.9	+
V/9.1	M	15.3
V/9.2	M	15.3
V/9.3	F	15.3	+
V/10.1	M	11.3	+
V/10.2	M	11.3
V/10.3	M	11.3
V/10.4	M	11.3
V/10.5	F	11.3	+
XVI/1.1	F	35.2	+
XVI/1.2	M	35.2	+
XVI/1.3	M	35.2
XVI/1.4	F	35.2	+
XVI/1.5	M	35.2
XVI/1.6	F	35.2	+
XVI/1.7	F	35.2
XVI/1.8	F	35.2
XVI/1.9	F	35.2
XVI/1.10	F	35.2	+
XVI/1.11	F	35.2
XVI/1.12	F	35.2
XVI/1.13	M	35.2	+
XVI/1.14	F	35.2
XVI/1.15	F	35.2
XVI/1.16	F	35.2
XVI/1.17	F	35.2	+
XVI/1.18	F	35.2	+
XVI/1.19	M	35.2	+
XVI/1.20	F	35.2
XVI/5.1	F	24.5
XVI/9.1	M	13.1
XVI/9.2	M	13.1
XVI/9.3	M	13.1
XVI/9.4	M	13.1
XVI/9.5	M	13.1
XVI/9.6	M	13.1	+
XVI/9.7	M	13.1
XVI/9.8	M	13.1	+
XVI/9.9	M	13.1
XIX/1.1	F	32.3
XIX/1.2	M	32.3	+
XIX/1.3	M	32.3	+
XIX/1.4	F	32.3	+
XIX/1.5	M	32.3
XIX/1.6	F	32.3
XIX/1.7	F	32.3
XIX/1.8	F	32.3
XIX/1.9	M	32.3	+
XIX/1.10	F	32.3
XIX/1.11	F	32.3	+
XIX/3.1	M	28.4
XIX/3.2	M	28.4
XIX/3.3	F	28.4
XIX/3.4	F	28.4
XIX/3.5	M	28.4
XIX/3.6	F	28.4	+
XIX/3.7	F	28.4
XIX/3.8	F	28.4	+
XIX/4.1	M	25.5	+
XIX/4.2	F	25.5
XIX/4.3	M	25.5
XIX/4.4	M	25.5
XIX/4.5	F	25.5	+
XIX/4.6	F	25.5	+
XIX/4.7	F	25.5
XIX/8.1	M	17.2
XIX/8.2	M	17.2	+
XIX/8.3	M	17.2
XIX/8.4	F	17.2	+
XIII/1.1	F	33	+
XIII/1.2	M	33
XIII/1.3	F	33
XIII/1.4	F	33	+
XIII/1.5	F	33
XIII/1.6	M	33	+
XIII/1.7	F	33	+
XIII/1.8	M	33
XIII/1.9	F	33	+
XIII/1.10	F	33	+
XIII/1.11	F	33
XIII/3.1	M	28.7
XIII/3.2	F	28.7
XIII/3.3	F	28.7
XIII/3.4	M	28.7	+
XIII/3.5	M	28.7
XIII/3.6	F	28.7	+
XIII/3.7	M	28.7
XIII/5.1	M	23.4
XIII/5.2	M	23.4
XIII/5.3	F	23.4
XIII/5.4	M	23.4
XIII/9.1	F	13.4	+
XIII/9.2	M	13.4
XIII/9.3	M	13.4
XIII/9.4	M	13.4
XIII/9.5	M	13.4
XIII/9.6	M	13.4	+
XIII/9.7	F	13.4
XIII/9.8	M	13.4
XV/1.1	F	32.9
XV/1.2	F	32.9
XV/1.3	F	32.9	+
XV/1.4	M	32.9
XV/1.5	F	32.9
XV/1.6	M	32.9
XV/1.7	M	32.9
XV/1.8	F	32.9
XV/1.9	F	32.9
XV/1.10	F	32.9
XV/1.11	M	32.9
XV/4.1	M	25.5	+
XV/4.2	M	25.5	+
XV/4.3	M	25.5
XV/6.1	F	20.7
XV/6.2	M	20.7
XV/7.1	M	18.6
XV/7.2	F	18.6
XV/7.3	M	18.6
XV/9.1	F	13.3	+
XV/9.2	F	13.3	+
XV/9.3	M	13.3	+
XV/9.4	M	13.3
XV/9.5	M	13.3
XV/9.6	M	13.3
XV/9.7	F	13.3	+
XV/9.8	M	13.3
XV/9.9	M	13.3	+
XV/9.10	M	13.3
XV/9.11	M	13.3
VIII/1.1	F	34
VIII/1.2	M	34
VIII/1.3	F	34
VIII/2.1	M	31.1	+
VIII/2.2	M	31.1	+
VIII/2.3	M	31.1
VIII/2.4	F	31.1
VIII/2.5	F	31.1	+
VIII/2.6	F	31.1
VIII/3.1	F	26.6
VIII/3.2	M	26.6
VIII/3.3	F	26.6	+
VIII/5.1	M	23.2	+
VIII/5.2	F	23.2
VIII/8.1	M	18.5
VIII/8.2	M	18.5
VIII/9.1	M	13.8
VIII/9.2	F	13.8	+
VIII/10.1	M	11.2
VIII/10.2	M	11.2
VIII/10.3	M	11.2
VIII/10.4	M	11.2
VIII/10.5	F	11.2
VIII/10.6	M	11.2
VIII/10.7	M	11.2
VIII/10.8	F	11.2
VIII/10.9	F	11.2
VIII/10.10	M	11.2
VIII/10.11	M	11.2	+
VIII/10.12	F	11.2
